# Supplementary material for: Characterization of Lgr6+ Cells as an Enriched Population of Hair Cell Progenitors Compared to Lgr5+ Cells for Hair Cell Generation in the Neonatal Mouse Cochlea
Source: PubMed Central journal article supplement (PMC5961437; doi:10.3389/fnmol.2018.00147), 2018-05-14
Supplement: Table_1.pdf [file Table_1.pdf]

---

| Gene   | Forward sequence               | Reverse sequence              |
|--------|--------------------------------|-------------------------------|
| Lgr6   | GTA TGA ACA ACC TCA CGG AGC    | TTG GAG GCC AGA GAA TGC C     |
| Sox2   | ATG AAC GGC TGG AGC AAC GGC A  | TCA CAT GTG CGA CAG GG GCA GT |
| Lgr5   | TCT TCA CCT CCT ACC TGG ACC T  | GGC GTA GTC TGC TAT GTG GTG T |
| Brn3.1 | CCC AAA TTC TCC AGC CTA CAC    | GGC GAG ATG TGC TCA AGT AAG T |
| Hes1   | ACG ACA CCG GAC AAA CCA        | ATG CCG GGA GCT ATC TTT CT    |
| Hes5   | TGC TCA GTC CCA AGG AGA AA     | AGC TTG GAG TTG GGC TGG T     |
| Nr2f1  | AAT ACT GCC GCC TCA AGA AG     | CGC AGC AGC AGA GAA ATG TA    |
| Skp2   | GCT GCC CTC GGT CCT TTA T      | TTG G AGC ACT CGG ACA GAA T   |
| Id1    | CCT GCT CTA CGA CAT G AA CG    | TTC AGA CTC CGA GTT CAG CT    |
| Dkk3   | CAA AGG TGG CAA TGG GAC C      | CAG TTC CCA GGT GAT GAG A     |
| Cdc7   | TGC T TG CCG TAT CTG GAA CA    | CCA AAC CGA AGT CCA CCA AG    |
| Mfng   | ACC GTG ATG TCT ATG TGG GC     | TGA GAG CAG AAG TGT CCA CA    |
| Dst    | CCA CGT GGT CAC TAT GTC CG     | CGA TGA TGA GTT T GC CCC AC   |
| Sox4   | AC ACC CTG CCG ACA AGA AA      | TCC ATC TTC GTA CAA CCC CA    |
| Hey2   | GAT CAT TTG AAG ATG CTC CAG G  | TCA AGC ACT CTC GGA ATC CA    |
| Fzd8   | CTG GCA TGA AGT GGG GTA ATG    | CGT AGG TTG TCA AGG CTC TG    |
| Esr2   | TTG TGC CAG CCC TGT TAC TA     | ACT GAT TCG TGG CTG GAC A     |
| Mcm3   | TGG AGC GGG AAC TTG AAA AC     | CAA AGC ACG TAC CGC AGA AG    |
| Maml2  | GGT CAC CCT TAC AAC TTC AGC    | GGA CTG CTG GGA GTT CAT GT    |
| Sfrp1  | AC CAC GGA AGC CTC TAA GC      | AGG GTT TCT TCT TCT TGG GGA   |
| Gapdh  | AAC GGG AAG CCC ATC ACC ATC TT | CAG CCT TGG CAG CAC CAG TGG   |

---
